# Supplementary material
Source: Springer Nature journal article supplement (https://www.springermedizin.de/resource/supplementary/12890_2013_653_MOESM8_ESM.pdf/9505590)

**A**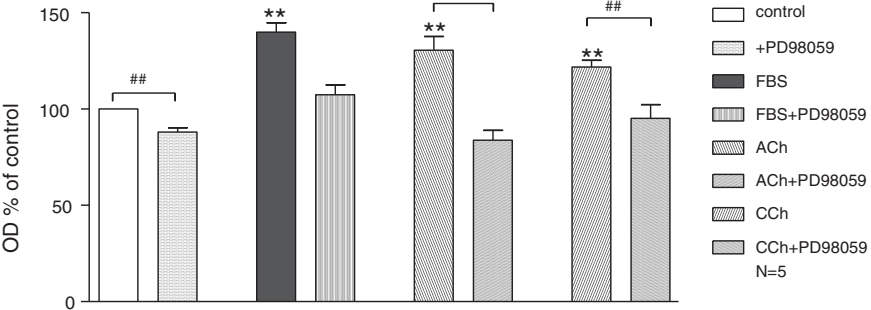**B**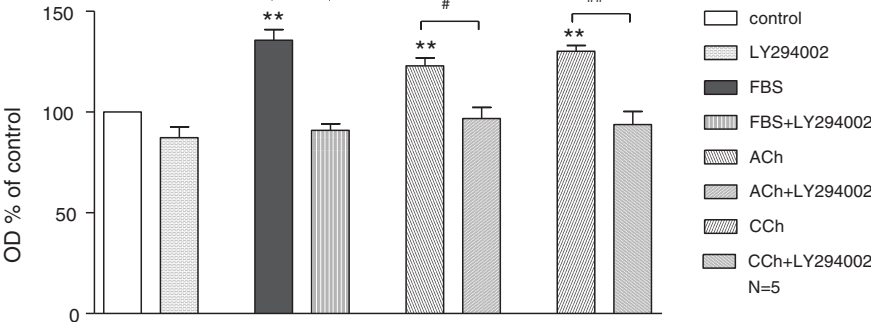

Supplement: MOESM8 [file 9505590]
